# Supplementary material for: Stable Aqueous Colloidal Solutions of Nd3+: LaF3 Nanoparticles, Promising for Luminescent Bioimaging in the Near-Infrared Spectral Range
Source: MDPI journal article supplement (doi:10.3390/nano11112847), 2021-10-26
Supplement: s1 [file s1]

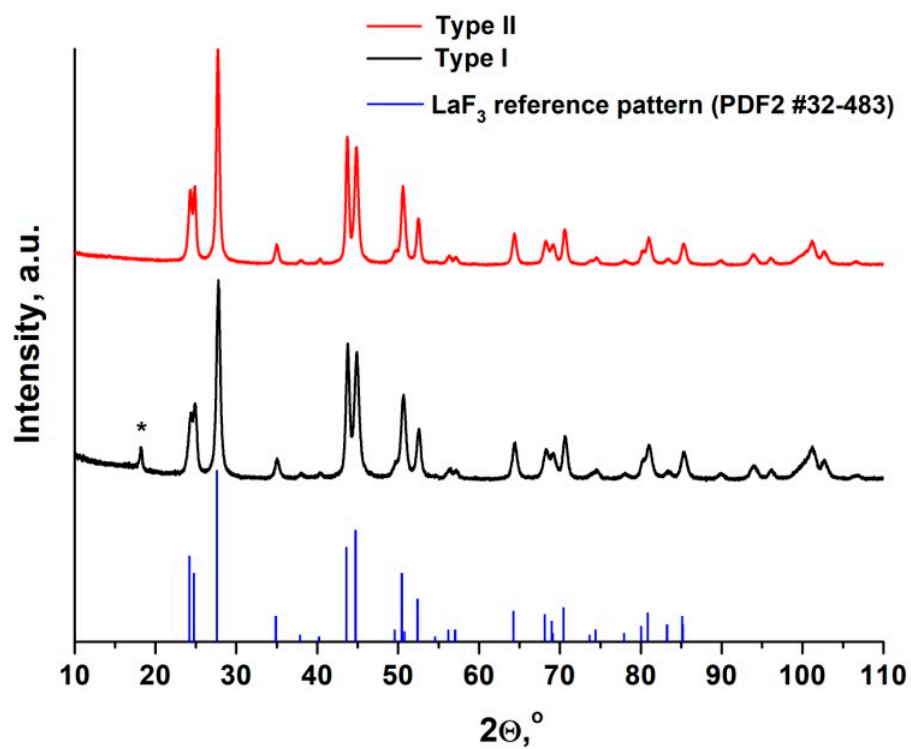

**Figure S1.** XRD patterns of synthesized LaF<sub>3</sub> NPs in comparison with the reference pattern from the ICDD database (#78-1864). (\*) is a reflection from the Teflon (polytetrafluorethylene) support, on which colloidal NPs were dried prior to XRD measurements).

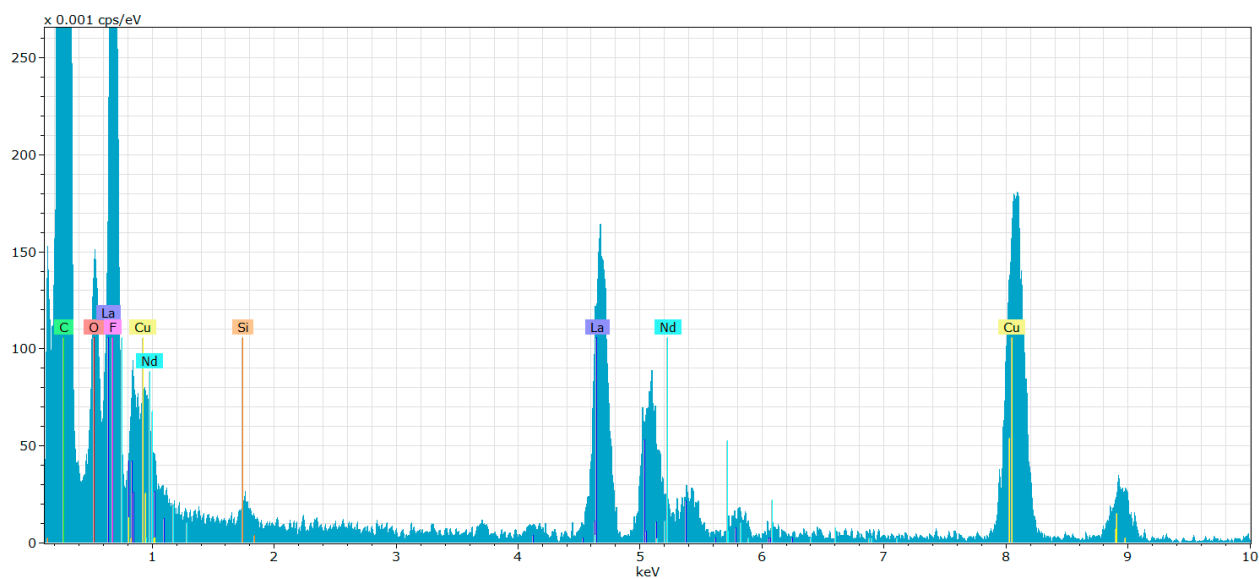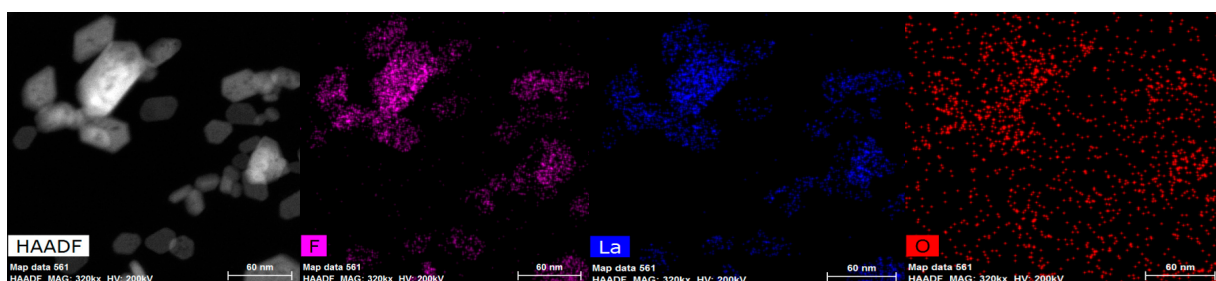

**Figure S2. a.** EDX spectrum (top) and microphotographs in the HAADF mode of the distribution of elements F, La, and O (oxygen) in 4 at%  $\text{Nd}^{3+}$ :  $\text{LaF}_3$  NPs of Sample type I.

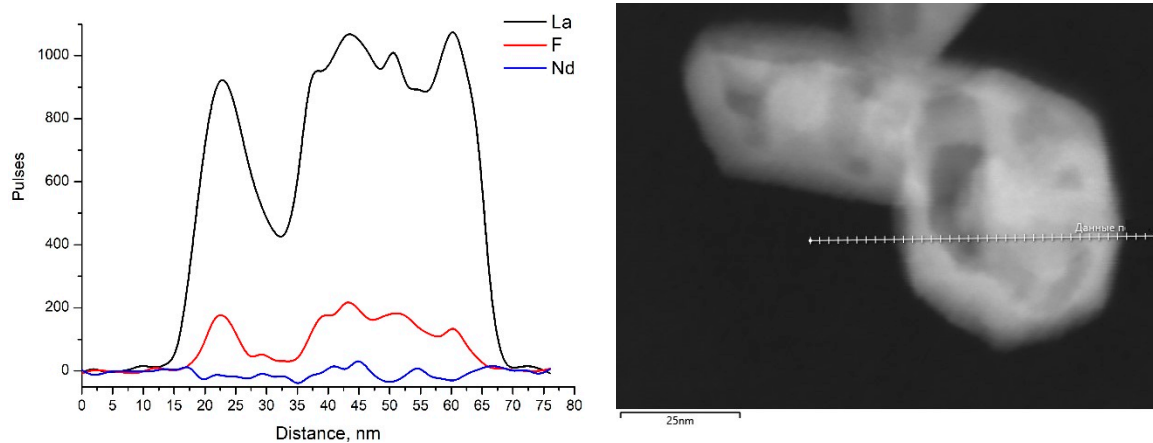

**Figure S2. b.** STEM image (left) and EDX distribution profile of elements (right) along the scanning line of a nanoparticle of the 1 at%  $\text{Nd}^{3+}$ :  $\text{LaF}_3$  sample type II; the ratio of the concentrations of La (black curve) and F (red curve) atoms along the scanning line remains constant; Nd atoms are determined at the trace level (blue curve) due to its low concentration (1 at%) in this sample.

**Table S1.** Parameters of Nd<sup>3+</sup>: LaF<sub>3</sub> NPs: unit cell, coherent scattering region (CSR) of X-rays by NPs, average nanoparticle sizes according to TEM results.

| Sample                                                              | $a$ , Å  | $c$ , Å  | CSD (mean size of scattering domain of NPs ( $\langle D \rangle_v$ ), nm) | Sizes of NPs in accordance with TEM, nm                                                                                   |                                                   |
|---------------------------------------------------------------------|----------|----------|---------------------------------------------------------------------------|---------------------------------------------------------------------------------------------------------------------------|---------------------------------------------------|
|                                                                     |          |          |                                                                           | Fine fraction                                                                                                             | Coarse fraction                                   |
| 0.01 at.%<br>Nd <sup>3+</sup> : LaF <sub>3</sub><br>(Sample type I) | 7.172(1) | 7.375(1) | <b>19 ± 1</b>                                                             | $D_F = 16 \pm 4$                                                                                                          | $D_C = 23 \pm 6$                                  |
|                                                                     |          |          |                                                                           | $d_F = 12 \pm 3$                                                                                                          | $d_C = 16 \pm 5$                                  |
|                                                                     |          |          |                                                                           | $\langle D_{F \text{ sphere}} \rangle = 13 \pm 4$                                                                         | $\langle D_{C \text{ sphere}} \rangle = 18 \pm 6$ |
|                                                                     |          |          |                                                                           | Volume ratio (Figure 3 a)                                                                                                 |                                                   |
|                                                                     |          |          |                                                                           | $D_F:D_C = 0.53:0.47$                                                                                                     | $d_F:d_C = 0.57:0.43$                             |
|                                                                     |          |          |                                                                           | $(D_F+d_F)/2 = (0.53+0.57)/2 = 0.55$                                                                                      |                                                   |
|                                                                     |          |          |                                                                           | $(D_C+d_C) = (0.47+0.43)/2 = 0.45$                                                                                        |                                                   |
|                                                                     |          |          |                                                                           | $\langle D_{\text{sphere}} \rangle = 0.55\langle D_{F \text{ sphere}} \rangle + 0.45\langle D_{C \text{ sphere}} \rangle$ |                                                   |
|                                                                     |          |          |                                                                           | $\langle D_{\text{sphere}} \rangle = 15.4 \pm 6$                                                                          |                                                   |
|                                                                     |          |          |                                                                           |                                                                                                                           |                                                   |
| 2 at% Nd <sup>3+</sup> :<br>LaF <sub>3</sub> (Sample type II)       | 7.177(1) | 7.377(1) | <b>24 ± 1</b>                                                             | $D_F = 21 \pm 4$                                                                                                          | $D_C = 30 \pm 7$                                  |
|                                                                     |          |          |                                                                           | $d_F = 16 \pm 4$                                                                                                          | $d_C = 23 \pm 6$                                  |
|                                                                     |          |          |                                                                           | $\langle D_{F \text{ sphere}} \rangle = 18 \pm 4$                                                                         | $\langle D_{C \text{ sphere}} \rangle = 25 \pm 7$ |
|                                                                     |          |          |                                                                           | Volume ratio (Figure 3 b)                                                                                                 |                                                   |
|                                                                     |          |          |                                                                           | $D_F:D_C = 0.49:0.51$                                                                                                     | $d_F:d_C = 0.64:0.36$                             |
|                                                                     |          |          |                                                                           | $(D_F+d_F)/2 = (0.49+0.64)/2 \approx 0.57$                                                                                |                                                   |
|                                                                     |          |          |                                                                           | $(D_C+d_C)/2 = (0.51+0.36)/2 \approx 0.43$                                                                                |                                                   |
|                                                                     |          |          |                                                                           | $\langle D_{\text{sphere}} \rangle = 0.57\langle D_{F \text{ sphere}} \rangle + 0.43\langle D_{C \text{ sphere}} \rangle$ |                                                   |
|                                                                     |          |          |                                                                           | $\langle D_{\text{sphere}} \rangle = 21 \pm 7$                                                                            |                                                   |
|                                                                     |          |          |                                                                           |                                                                                                                           |                                                   |

\*Indices <sub>F</sub> and <sub>C</sub> correspond to the characteristic sizes for the parameters, respectively, of fine and coarse fractions of both samples of NPs;  $D_F$ ,  $d_F$  and  $D_C$ ,  $d_C$  are small and large diameters of model ellipses, which approximate TEM images of projections of NPs of fine and coarse fractions;  $\langle D_{N \text{ sphere}} \rangle$  are average diameters of the sphere, calculated from the condition of equality of the volume of a sphere with such a diameter  $\langle D_{N \text{ sphere}} \rangle$  and model ellipsoids obtained by rotating an ellipse with diameters  $D_N$  and  $d_N$  relative to a large diameter  $D_N$ ;  $\langle D_{\text{sphere}} \rangle$  values are calculated taking into account the average specific contribution of both fractions of NPs, each of which is characterized by an average diameter  $\langle D_{N \text{ sphere}} \rangle$ .
